# Supplementary material for: TGF-β signaling and Creb5 cooperatively regulate Fgf18 to control pharyngeal muscle development
Source: eLife. 2022 Dec 21;11:e80405. doi: 10.7554/eLife.80405 (PMC9771365; doi:10.7554/eLife.80405)
Supplement: Figure 3—figure supplement 3—source data 1. [file elife-80405-fig3-figsupp3-data1.xlsx]

## Sheet: Sheet1
Control	Osr2cre;Tgfbr1fl/fl
6.5	0
7	1.2
8	3
5.5	1.5
p=0.0006
