# Supplementary material for: TGF-β signaling and Creb5 cooperatively regulate Fgf18 to control pharyngeal muscle development
Source: eLife. 2022 Dec 21;11:e80405. doi: 10.7554/eLife.80405 (PMC9771365; doi:10.7554/eLife.80405)
Supplement: Figure 4—figure supplement 2—source data 2. [file elife-80405-fig4-figsupp2-data2.xlsx]

## Sheet: Sheet1
Control	Osr2cre;Tgfbr1fl/fl
19.5	15.5
20.1	15
24.2	9.6
p=0.0301
