# Supplementary material for: TGF-β signaling and Creb5 cooperatively regulate Fgf18 to control pharyngeal muscle development
Source: eLife. 2022 Dec 21;11:e80405. doi: 10.7554/eLife.80405 (PMC9771365; doi:10.7554/eLife.80405)
Supplement: Figure 5—source data 1. [file elife-80405-fig5-data1.xlsx]

## Sheet: Sheet1
Control	Osr2cre;Tgfbr1fl/fl
9.6	6.1
7.8	4.4
8.2	4.6
p=0.0102
