# Supplementary material for: TGF-β signaling and Creb5 cooperatively regulate Fgf18 to control pharyngeal muscle development
Source: eLife. 2022 Dec 21;11:e80405. doi: 10.7554/eLife.80405 (PMC9771365; doi:10.7554/eLife.80405)
Supplement: Figure 6—source data 1. [file elife-80405-fig6-data1.xlsx]

## Sheet: Sheet1
IgG	Smad2/3
1.34	3.09
0.87	4.72
0.79	2.12
p=0.041067
