# Supplementary material for: TGF-β signaling and Creb5 cooperatively regulate Fgf18 to control pharyngeal muscle development
Source: eLife. 2022 Dec 21;11:e80405. doi: 10.7554/eLife.80405 (PMC9771365; doi:10.7554/eLife.80405)
Supplement: Figure 6—source data 2. [file elife-80405-fig6-data2.xlsx]

## Sheet: Sheet1
	4hr
	BSA	TGF-β1
	1	3.14
	1	2.7
	1	2.72
	P=0.0002
	18hr
	BSA	TGF-β1
	1.00384	1.79
	1.00019	1.33
	1.01	1.94
	p=0.0207
