# Supplementary material for: TGF-β signaling and Creb5 cooperatively regulate Fgf18 to control pharyngeal muscle development
Source: eLife. 2022 Dec 21;11:e80405. doi: 10.7554/eLife.80405 (PMC9771365; doi:10.7554/eLife.80405)
Supplement: Figure 6—source data 3. [file elife-80405-fig6-data3.xlsx]

## Sheet: Sheet1
Control CRISPRi plasmid + BSA	Control CRISPRi plasmid + TGF-β1	Fgf18 CRISPRi plasmid + TGF-β1
1	1.65	1.04
1	1.96	1.13
1	1.85	1.34
Control CRISPRi plasmid + BSA vs. Control CRISPRi plasmid + TGF-β1		p=0.0005
Control CRISPRi plasmid + BSA vs. Fgf18 CRISPRi plasmid + TGF-β1		p=0.3277
Control CRISPRi plasmid + TGF-β1 vs. Fgf18 CRISPRi plasmid + TGF-β1		p=0.0018
