# Supplementary material for: TGF-β signaling and Creb5 cooperatively regulate Fgf18 to control pharyngeal muscle development
Source: eLife. 2022 Dec 21;11:e80405. doi: 10.7554/eLife.80405 (PMC9771365; doi:10.7554/eLife.80405)
Supplement: Figure 6—source data 4. [file elife-80405-fig6-data4.xlsx]

## Sheet: Sheet1
Control siRNA	Creb5 siRNA
1	0.14
1	0.29
1.01	0.21
P<0.0001
