# Supplementary material for: TGF-β signaling and Creb5 cooperatively regulate Fgf18 to control pharyngeal muscle development
Source: eLife. 2022 Dec 21;11:e80405. doi: 10.7554/eLife.80405 (PMC9771365; doi:10.7554/eLife.80405)
Supplement: Figure 6—source data 5. [file elife-80405-fig6-data5.xlsx]

## Sheet: Sheet1
	Control siRNA	Creb5 siRNA
	1	0.38
	1	0.46
	1	0.21
	p=0.0009
