# Supplementary material for: TGF-β signaling and Creb5 cooperatively regulate Fgf18 to control pharyngeal muscle development
Source: eLife. 2022 Dec 21;11:e80405. doi: 10.7554/eLife.80405 (PMC9771365; doi:10.7554/eLife.80405)
Supplement: Figure 6—source data 6. [file elife-80405-fig6-data6.xlsx]

## Sheet: Sheet1
Control siRNA +BSA	Control siRNA+ TGF-β1	Creb5 siRNA + TGF-β1
1.04	2.26	1.66
1.04	2.46	1.51
1.01	2.99	1.81
Control siRNA +BSA vs. Control siRNA+ TGF-β1					p=0.0005
Control siRNA +BSA vs. Creb5 siRNA + TGF-β1					p=0.038
Control siRNA+ TGF-β1 vs. Creb5 siRNA + TGF-β1					p=0.0075
