# Supplementary material for: TGF-β signaling and Creb5 cooperatively regulate Fgf18 to control pharyngeal muscle development
Source: eLife. 2022 Dec 21;11:e80405. doi: 10.7554/eLife.80405 (PMC9771365; doi:10.7554/eLife.80405)
Supplement: Figure 7—figure supplement 2—source data 1. [file elife-80405-fig7-figsupp2-data1.xlsx]

## Sheet: Sheet1
Control	Osr2Cre;Fgf18fl/fl
49.34	27.3
48.82	20.67
45.01	33.45
p=0.0064
