# Supplementary material for: TGF-β signaling and Creb5 cooperatively regulate Fgf18 to control pharyngeal muscle development
Source: eLife. 2022 Dec 21;11:e80405. doi: 10.7554/eLife.80405 (PMC9771365; doi:10.7554/eLife.80405)
Supplement: Figure 7—figure supplement 2—source data 2. [file elife-80405-fig7-figsupp2-data2.xlsx]

## Sheet: Sheet1
BSA	FGF18
30.39	42.6
35.51	47.16
33.92	45.88
p=0.0042
