# Supplementary material for: TGF-β signaling and Creb5 cooperatively regulate Fgf18 to control pharyngeal muscle development
Source: eLife. 2022 Dec 21;11:e80405. doi: 10.7554/eLife.80405 (PMC9771365; doi:10.7554/eLife.80405)
Supplement: Figure 7—figure supplement 2—source data 3. [file elife-80405-fig7-figsupp2-data3.xlsx]

## Sheet: Sheet1
BSA	FGF18
0.68	1.65
0.43	1.95
0.7	2.09
0.61	1.6
0.57	1.73
0.9	1.62
p<0.0001
