# Supplementary material for: TGF-β signaling and Creb5 cooperatively regulate Fgf18 to control pharyngeal muscle development
Source: eLife. 2022 Dec 21;11:e80405. doi: 10.7554/eLife.80405 (PMC9771365; doi:10.7554/eLife.80405)
Supplement: Figure 7—source data 2. [file elife-80405-fig7-data2.xlsx]

## Sheet: Sheet1
Control	Osr2Cre;Fgf18fl/fl
0.048	0.027
0.049	0.032
0.047	0.036
0.05	0.019
p=0.0017
